# Supplementary material for: Extending the shelf life of HLM chips through freeze-drying of human liver microsomes immobilized onto thiol–ene micropillar arrays
Source: Royal Society of Chemistry journal article supplement (doi:10.1039/d4lc00429a), 2024-01-01
Supplement: d4lc00429a1.pdf [file d4lc00429a1.pdf]

## Extending the Shelf Life of HLM Chips through Freeze-Drying of Human Liver Microsomes Immobilized onto Thiol-ene Micropillar Arrays

Iiro Rautsola<sup>a</sup>, Markus Haapala<sup>a</sup>, Leo Huttunen<sup>a</sup>, Ossi Korhonen<sup>b</sup>, Tiina Sikanen<sup>\*a, c</sup>

<sup>a</sup> Faculty of Pharmacy, Drug Research Program, University of Helsinki, Finland

<sup>b</sup> Faculty of Health Sciences, School of Pharmacy, University of Eastern Finland, Finland

<sup>c</sup> Helsinki Institute of Sustainability Science, University of Helsinki, Finland

\* Corresponding author: [tiina.sikanen@helsinki.fi](mailto:tiina.sikanen@helsinki.fi)

### Supplementary material

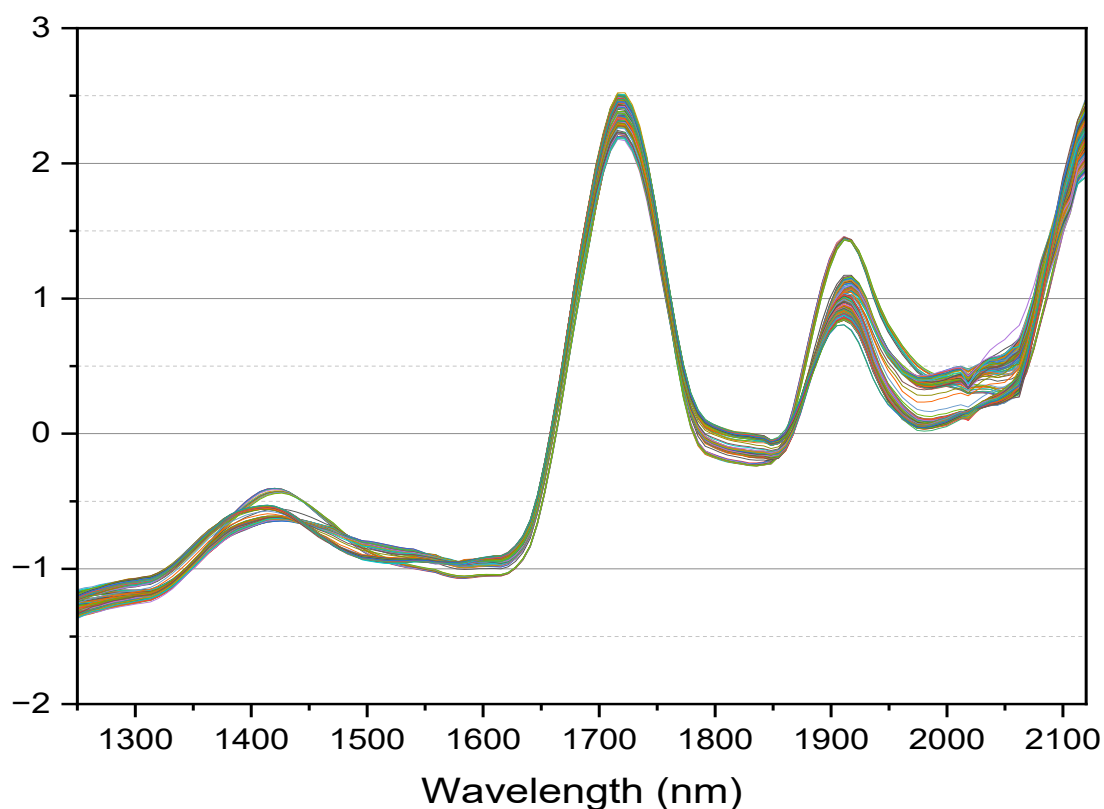

**Figure S1.** Pretreated infrared spectra, after Savitzky-Golay smoothing and Standard Normal Variate (SNV) correction, collected from the HLM chip during the freeze-drying process under optimized conditions.
